# Supplementary material for: Lagrangian surface drifter observations in the North Sea: an overview of high-resolution tidal dynamics and surface currents
Source: Copernicus journal article supplement (doi:10.5194/essd-16-2099-2024), 2024-04-30
Supplement: Supplementary file 1 [file essd-16-2099-2024-supplement.pdf]

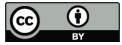

*Supplement of*

## **Lagrangian surface drifter observations in the North Sea: an overview of high-resolution tidal dynamics and surface currents**

**Lisa Deyle et al.**

*Correspondence to:* Lisa Deyle ([lisa.deyle@uni-oldenburg.de](mailto:lisa.deyle@uni-oldenburg.de))

The copyright of individual parts of the supplement might differ from the article licence.

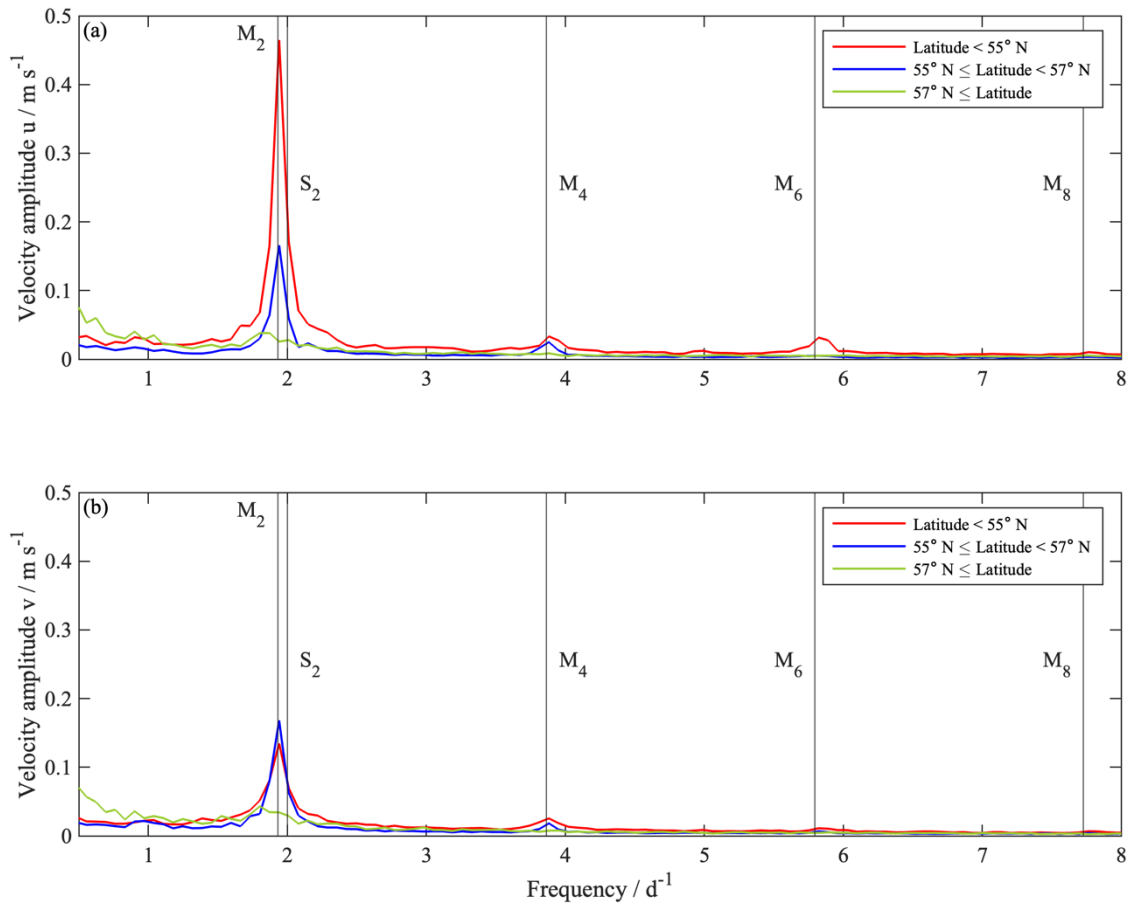

**Figure S1: Spectral analysis using a Fourier transform of (a) zonal  $u$  and (b) meridional  $v$  drifter velocities averaged over trajectories. The periods of the semidiurnal and shallow water tidal components are indicated by the vertical lines.**
